# Supplementary material
Source: Springer Nature journal article supplement (https://www.springermedizin.de/resource/supplementary/12939_2011_217_MOESM2_ESM.pdf/9550624)
Supplement: MOESM2 [file 9550624]

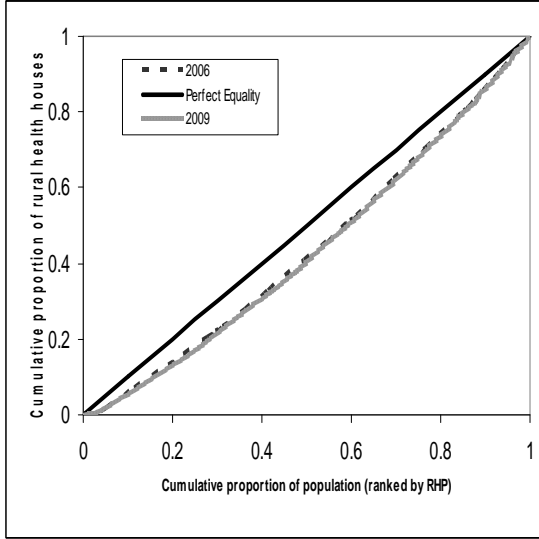

(a)

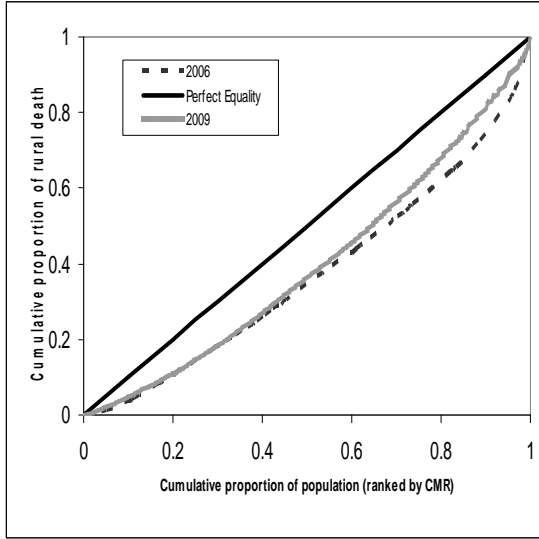

(b)

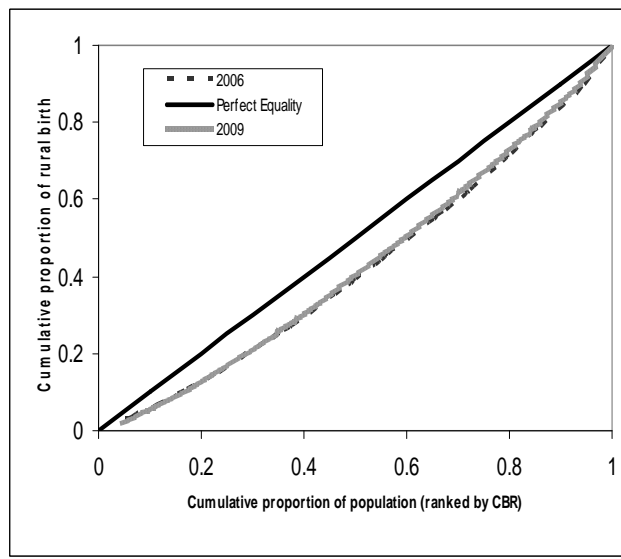

(c)

\*Rural health houses

\*\*Crude Mortality Rate (per 1000 rural people)

\*\*\* Crude Birth Rate (per 1000 rural people)
